# Supplementary material for: Twenty-Seven Year Response of South Carolina Coastal Plain Forests Affected by Hurricane Hugo
Source: MDPI journal article supplement (doi:10.3390/plants12040691), 2023-02-04
Supplement: s1 [file s1]

Supplemental Data

Importance values in 2016 for all sites, Tables S1-S11

Table S1. ID code, scientific name, and Importance Value (IV) for tree species in Beidler Forest cypress-tupelo vegetation type.

| Species code | Common Name     | Scientific Name                      | IV(%)  |
|--------------|-----------------|--------------------------------------|--------|
| gash         | green ash       | <i>Fraxinus pennsylvanica</i> Marsh. | 36.652 |
| tupe         | tupelo          | <i>Nyssa spp.</i>                    | 27.939 |
| bcyp         | baldcypress     | <i>Taxodium distichum</i> (L.) Rich. | 21.923 |
| bgum         | black gum       | <i>Nyssa sylvatica</i> Marsh.        | 6.256  |
| laur         | laurel oak      | <i>Quercus laurifolia</i> Michx.     | 2.803  |
| rmap         | red maple       | <i>Acer rubrum</i> L.                | 1.216  |
| sdog         | swamp dogwood   | <i>Cornus foemina</i> Mill.          | 0.635  |
| wloc         | water locust    | <i>Gleditsia aquatica</i> Marsh.     | 0.584  |
| selm         | slippery elm    | <i>Ulmus rubra</i> Muhl.             | 0.465  |
| aelm         | American elm    | <i>Ulmus americana</i> L.            | 0.420  |
| sgum         | sweetgum        | <i>Liquidambar styraciflua</i> L.    | 0.355  |
| ocup         | overcup oak     | <i>Quercus lyrata</i> Walter         | 0.204  |
| elm          | elm             | <i>Ulmus spp.</i>                    | 0.097  |
| ash          | ash             | <i>Fraxinus spp.</i>                 | 0.088  |
| will         | black willow    | <i>Salix nigra</i> Marsh.            | 0.069  |
| wlok         | willow oak      | <i>Quercus phellos</i> L.            | 0.048  |
| wash         | white ash       | <i>Fraxinus americana</i> L.         | 0.046  |
| butn         | buttonbush      | <i>Cephalanthus occidentalis</i> L.  | 0.045  |
| vwil         | Virginia willow | <i>Itea virginica</i> L.             | 0.044  |
| unkn         | unknown         | unknown                              | 0.022  |
| boxe         | boxelder        | <i>Acer negundo</i> L.               | 0.022  |
| adog         | dogwood         | <i>Cornus spp.</i>                   | 0.022  |
| ahol         | American holly  | <i>Ilex opaca</i> Aiton              | 0.022  |
| TOTAL IV     |                 |                                      | 99.978 |

Table S2. ID code, scientific name, and Importance Value (IV) for tree species in Beidler Forest bottomland hardwood vegetation type.

| Species code | Common Name     | Scientific Name                         | IV(%)  |
|--------------|-----------------|-----------------------------------------|--------|
| laur         | laurel oak      | <i>Quercus laurifolia</i> Michx.        | 28.464 |
| sgum         | sweetgum        | <i>Liquidambar styraciflua</i> L.       | 13.258 |
| bcyp         | baldcypress     | <i>Taxodium distichum</i> (L.) Rich.    | 8.762  |
| rmap         | red maple       | <i>Acer rubrum</i> L.                   | 8.509  |
| horn         | ironwood        | <i>Carpinus caroliniana</i> Walter      | 8.133  |
| gash         | green ash       | <i>Fraxinus pennsylvanica</i> Marsh.    | 6.924  |
| dhol         | deciduous holly | <i>Ilex decidua</i> Walter              | 4.514  |
| rbuc         | red buckeye     | <i>Aesculus pavia</i> L.                | 2.480  |
| tupe         | water tupelo    | <i>Nyssa aquatica</i> L.                | 2.411  |
| elm          | elm             | <i>Ulmus</i> spp.                       | 2.354  |
| bgum         | black gum       | <i>Nyssa sylvatica</i> Marsh.           | 2.265  |
| sdog         | swamp dogwood   | <i>Cornus foemina</i> Mill.             | 1.902  |
| ocup         | overcup oak     | <i>Quercus lyrata</i> Walter            | 1.843  |
| ahol         | American holly  | <i>Ilex opaca</i> Aiton                 | 1.663  |
| ash          | ash             | <i>Fraxinus</i> spp.                    | 1.559  |
| will         | black willow    | <i>Salix nigra</i> Marsh.               | 1.019  |
| selm         | slippery elm    | <i>Ulmus rubra</i> Muhl.                | 0.082  |
| cbok         | cherrybark oak  | <i>Quercus pagoda</i> Raf.              | 0.663  |
| pers         | persimmon       | <i>Diospyros virginiana</i> L.          | 0.387  |
| whik         | water hickory   | <i>Carya aquatica</i> (Michx. f.) Nutt. | 0.384  |
| aelm         | American elm    | <i>Ulmus americana</i> L.               | 0.329  |
| hawt         | hawthorn        | <i>Crataegus</i> spp.                   | 0.262  |
| rbay         | redbay          | <i>Persea borbonia</i> (L.) Spreng.     | 0.253  |
| welm         | winged elm      | <i>Ulmus alata</i> Michx.               | 0.189  |
| butn         | buttonbush      | <i>Cephalanthus occidentalis</i> L.     | 0.162  |
| woak         | water oak       | <i>Quercus nigra</i> L.                 | 0.153  |
| wloc         | water locust    | <i>Gleditsia aquatica</i> Marsh.        | 0.109  |
| inkb         | inkberry        | <i>Ilex glabra</i> (L.) A. Gray         | 0.065  |
| vibo         | viburnum        | <i>Viburnum</i> spp.                    | 0.065  |

|          |            |                                 |         |
|----------|------------|---------------------------------|---------|
| sugb     | sugarberry | <i>Celtis laevigata</i> Willd.  | 0.033   |
| bacc     | baccharis  | <i>Baccharis halimifolia</i> L. | 0.032   |
| TOTAL IV |            |                                 | 100.000 |

Table S3. ID code, scientific name, and Importance Value (IV) for tree species in Beidler Forest ridge bottom vegetation type.

| Species code | Common Name        | Scientific Name                      | IV(%)  |
|--------------|--------------------|--------------------------------------|--------|
| horn         | hornbeam,ironwood  | <i>Carpinus caroliniana</i> Walter   | 29.484 |
| sgum         | sweetgum           | <i>Liquidambar styraciflua</i> L.    | 13.222 |
| ahol         | American holly     | <i>Ilex opaca</i> Aiton              | 7.571  |
| woak         | water oak          | <i>Quercus nigra</i> L.              | 7.432  |
| laur         | laurel oak         | <i>Quercus laurifolia</i> Michx.     | 5.536  |
| rbay         | redbay             | <i>Persea borbonia</i> (L.) Spreng   | 5.247  |
| coak         | swamp chestnut oak | <i>Quercus michauxii</i> Nutt.       | 4.697  |
| rmap         | red maple          | <i>Acer rubrum</i> L.                | 4.463  |
| sprp         | spruce pine        | <i>Pinus glabra</i> Walter           | 4.006  |
| phik         | pignut hickory     | <i>Carya glabra</i> (Mill.) Sweet    | 2.218  |
| rhik         | shagbark hickory   | <i>Carya ovata</i> (Mill.) K. Koch   | 1.883  |
| elm          | elm                | <i>Ulmus</i> spp.                    | 1.603  |
| gash         | green ash          | <i>Fraxinus pennsylvanica</i> Marsh. | 1.492  |
| welm         | winged elm         | <i>Ulmus alata</i> Michx.            | 1.408  |
| selm         | slippery elm       | <i>Ulmus rubra</i> Muhl.             | 1.178  |
| bgum         | black gum          | <i>Nyssa sylvatica</i> Marsh.        | 1.092  |
| lobp         | loblolly pine      | <i>Pinus taeda</i> L.                | 1.088  |
| sdog         | swamp dogwood      | <i>Cornus foemina</i> Mill.          | 1.067  |
| dhol         | deciduous holly    | <i>Ilex decidua</i> Walter           | 0.776  |
| dogw         | flowering dogwood  | <i>Cornus florida</i> L.             | 0.571  |
| ash          | ash                | <i>Fraxinus</i> spp.                 | 0.563  |
| aelm         | American elm       | <i>Ulmus americana</i> L.            | 0.504  |
| cbok         | cherrybark oak     | <i>Quercus pagoda</i> Raf.           | 0.491  |
| sbay         | sweetbay           | <i>Magnolia virginiana</i> L.        | 0.472  |
| rbuc         | red buckeye        | <i>Aesculus pavia</i> L.             | 0.435  |
| sugb         | sugarberry         | <i>Celtis laevigata</i> Willd.       | 0.359  |
| blko         | black oak          | <i>Quercus velutina</i> Lam.         | 0.218  |
| pers         | persimmon          | <i>Diospyros virginiana</i> L.       | 0.190  |
| hawt         | hawthorn           | <i>Crataegus</i> spp.                | 0.167  |
| ypop         | yellow poplar      | <i>Liriodendron tulipifera</i> L.    | 0.067  |

|          |                   |                                      |         |
|----------|-------------------|--------------------------------------|---------|
| wlok     | water locust      | <i>Gleditsia aquatica</i> Marsh.     | 0.065   |
| vibo     | viburnum          | <i>Viburnum</i> spp.                 | 0.058   |
| sugb     | sugarberry        | <i>Celtis laevigata</i> Willd.       | 0.055   |
| unkn     | unknown           | unknown                              | 0.039   |
| mulb     | red mulberry      | <i>Morus rubra</i> L.                | 0.038   |
| live     | live oak          | <i>Quercus virginiana</i> Mill.      | 0.031   |
| bcyp     | baldcypress       | <i>Taxodium distichum</i> (L.) Rich. | 0.027   |
| mhik     | mockernut hickory | <i>Carya tomentosa</i> (Lam.) Nutt.  | 0.027   |
| hick     | hickory           | <i>Carya</i> spp.                    | 0.022   |
| ocup     | overcup oak       | <i>Quercus lyrata</i> Walter         | 0.021   |
| tupe     | water tupelo      | <i>Nyssa aquatica</i> L.             | 0.020   |
| cher     | black cherry      | <i>Prunus serotina</i> Ehrh.         | 0.020   |
| waxm     | wax myrtle        | <i>Morella cerifera</i> (L.) Small   | 0.020   |
| wsum     | winged sumac      | <i>Rhus copallinum</i> L.            | 0.019   |
| adog     | dogwood           | <i>Cornus</i> spp.                   | 0.019   |
| shok     | Shumard oak       | <i>Quercus shumardii</i> Buckley     | 0.019   |
| TOTAL IV |                   |                                      | 100.000 |

Table S4. ID code, scientific name, and Importance Value (IV) for tree species in Congaree cypress tupelo vegetation type.

| Species code | Common Name        | Scientific Name                             | IV(%)  |
|--------------|--------------------|---------------------------------------------|--------|
| tupe         | water tupelo       | <i>Nyssa aquatica</i> L.                    | 32.946 |
| stup         | swamp tupelo       | <i>Nyssa biflora</i> Walter                 | 17.397 |
| bcyp         | baldcypress        | <i>Taxodium distichum</i> (L.) Rich.        | 16.137 |
| rmap         | red maple          | <i>Acer rubrum</i> L.                       | 9.816  |
| wash         | white ash          | <i>Fraxinus americana</i> L.                | 6.292  |
| ahol         | American holly     | <i>Ilex opaca</i> Aiton                     | 4.405  |
| laur         | laurel oak         | <i>Quercus laurifolia</i> Michx.            | 2.929  |
| sgum         | sweetgum           | <i>Liquidambar styraciflua</i> L.           | 2.819  |
| plan         | water elm          | <i>Planera aquatica</i> J.F. Gmel.          | 1.329  |
| horn         | ironwood           | <i>Carpinus caroliniana</i> Walter          | 1.108  |
| sbay         | sweetbay           | <i>Magnolia virginiana</i> L.               | 0.910  |
| rbay         | redbay             | <i>Persea borbonia</i> (L.) Spreng          | 0.813  |
| dhol         | deciduous holly    | <i>Ilex decidua</i> Walter                  | 0.566  |
| ocup         | overcup oak        | <i>Quercus lyrata</i> Walter                | 0.385  |
| sugb         | sugarberry         | <i>Celtis laevigata</i> Willd.              | 0.368  |
| blue         | blueberry          | <i>Vaccinium elliotii</i> Chapm.            | 0.320  |
| cash         | Carolina ash       | <i>Fraxinus caroliniana</i> Mill.           | 0.319  |
| aelm         | American elm       | <i>Ulmus americana</i> L.                   | 0.293  |
| selm         | slippery elm       | <i>Ulmus rubra</i> Muhl.                    | 0.123  |
| whol         | winterberry        | <i>Ilex verticillata</i> (L.) A. Gray       | 0.120  |
| welm         | winged elm         | <i>Ulmus alata</i> Michx.                   | 0.099  |
| cher         | black cherry       | <i>Prunus serotina</i> Ehrh.                | 0.088  |
| bech         | beech              | <i>Fagus grandifolia</i> Ehrh.              | 0.081  |
| woak         | water oak          | <i>Quercus nigra</i> L.                     | 0.048  |
| boxe         | boxelder           | <i>Acer negundo</i> L.                      | 0.045  |
| hawt         | hawthorn           | <i>Crataegus</i> spp.                       | 0.045  |
| cttn         | eastern cottonwood | <i>Populus deltoides</i> W. Bart. ex Marsh. | 0.042  |
| gash         | green ash          | <i>Fraxinus pennsylvanica</i> Marsh.        | 0.040  |
| butn         | buttonbush         | <i>Cephalanthus occidentalis</i> L.         | 0.040  |

|          |         |                   |         |
|----------|---------|-------------------|---------|
| unkn     | unknown | unknown           | 0.020   |
| hick     | hickory | <i>Carya</i> spp. | 0.040   |
| TOTAL IV |         |                   | 100.000 |



Table S5. ID code, scientific name, and Importance Value (IV) for tree species in Congaree bottomland hardwood vegetation type.

| Species code | Common Name        | Scientific Name                          | IV(%)  |
|--------------|--------------------|------------------------------------------|--------|
| sgum         | sweetgum           | <i>Liquidambar styraciflua</i> L.        | 32.436 |
| pawp         | pawpaw             | <i>Asimina triloba</i> (L.) Dunal        | 15.688 |
| dhoh         | deciduous holly    | <i>Ilex decidua</i> Walter               | 11.473 |
| ahoh         | American holly     | <i>Ilex opaca</i> Aiton                  | 9.980  |
| sugb         | sugarberry         | <i>Celtis laevigata</i> Willd.           | 5.129  |
| ash          | ash                | <i>Fraxinus</i> spp.                     | 4.331  |
| aelm         | American elm       | <i>Ulmus americana</i> L.                | 3.591  |
| horn         | hornbeam, ironwood | <i>Carpinus caroliniana</i> Walter       | 2.680  |
| boxe         | boxelder           | <i>Acer negundo</i> L.                   | 2.185  |
| laur         | laurel oak         | <i>Quercus laurifolia</i> Michx.         | 1.545  |
| sycm         | sycamore           | <i>Platanus occidentalis</i> L.          | 1.180  |
| bitr         | bitternut hickory  | <i>Carya cordiformis</i> (Wang.) K. Koch | 1.112  |
| gash         | green ash          | <i>Fraxinus pennsylvanica</i> Marsh      | 1.083  |
| rmap         | red maple          | <i>Acer rubrum</i> L.                    | 0.981  |
| coak         | swamp chestnut oak | <i>Quercus michauxii</i> Nutt.           | 0.914  |
| welm         | winged elm         | <i>Ulmus alata</i> Michx.                | 0.796  |
| bech         | beech              | <i>Fagus grandifolia</i> Ehrh.           | 0.755  |
| shok         | Shumard oak        | <i>Quercus shumardii</i> Buckley         | 0.616  |
| hick         | hickory            | <i>Carya</i> spp.                        | 0.568  |
| spic         | spicebush          | <i>Lindera benzoin</i> (L.) Blume        | 0.565  |
| hawt         | hawthorn           | <i>Crataegus</i> spp.                    | 0.458  |
| stup         | swamp tupelo       | <i>Nyssa biflora</i> Walter              | 0.390  |
| ypop         | yellow poplar      | <i>Liriodendron tulipifera</i> L.        | 0.312  |
| rhik         | shagbark hickory   | <i>Carya ovata</i> (Mill.) K. Koch       | 0.181  |
| tupe         | water tupelo       | <i>Nyssa aquatica</i> L.                 | 0.177  |
| ocup         | overcup oak        | <i>Quercus lyrata</i> Walter             | 0.128  |
| unkn         | unknown            | unknown                                  | 0.121  |
| selm         | slippery elm       | <i>Ulmus rubra</i> Muhl.                 | 0.106  |
| cbok         | cherrybark oak     | <i>Quercus pagoda</i> Raf.               | 0.106  |
| pers         | persimmon          | <i>Diospyros virginiana</i> L.           | 0.105  |

|          |               |                                         |         |
|----------|---------------|-----------------------------------------|---------|
| whik     | water hickory | <i>Carya aquatica</i> (Michx. f.) Nutt. | 0.086   |
| mulb     | red mulberry  | <i>Morus rubra</i> L.                   | 0.080   |
| plan     | water elm     | <i>Planera aquatica</i> J.F. Gmel.      | 0.069   |
| rbuc     | red buckeye   | <i>Aesculus pavia</i> L.                | 0.038   |
| bgum     | black gum     | <i>Nyssa sylvatica</i> Marsh.           | 0.038   |
| TOTAL IV |               |                                         | 100.000 |

Table S6. ID code, scientific name, and Importance Value (IV) for tree species in Congaree pine hardwood plots.

| Species code | Common Name        | Scientific Name                      | IV(%)   |
|--------------|--------------------|--------------------------------------|---------|
| horn         | hornbeam, ironwood | <i>Carpinus caroliniana</i> Walter   | 27.248  |
| lobp         | loblolly pine      | <i>Pinus taeda</i> L.                | 26.533  |
| sgum         | sweetgum           | <i>Liquidambar styraciflua</i> L.    | 11.836  |
| ahol         | American holly     | <i>Ilex opaca</i> Aiton              | 7.023   |
| rmap         | red maple          | <i>Acer rubrum</i> L.                | 6.759   |
| wlok         | willow oak         | <i>Quercus phellos</i> L.            | 5.056   |
| welm         | winged elm         | <i>Ulmus alata</i> Michx.            | 4.067   |
| laur         | laurel oak         | <i>Quercus laurifolia</i> Michx.     | 2.231   |
| gash         | green ash          | <i>Fraxinus pennsylvanica</i> Marsh. | 1.971   |
| stup         | swamp tupelo       | <i>Nyssa biflora</i> Walter          | 1.414   |
| pawp         | pawpaw             | <i>Asimina triloba</i> (L.) Dunal    | 1.321   |
| coak         | swamp chestnut oak | <i>Quercus michauxii</i> Nutt.       | 1.305   |
| selm         | slippery elm       | <i>Ulmus rubra</i> Muhl.             | 0.936   |
| dhol         | deciduous holly    | <i>Ilex decidua</i> Walter           | 0.550   |
| elm          | elm                | <i>Ulmus</i> spp.                    | 0.426   |
| aelm         | American elm       | <i>Ulmus americana</i> L.            | 0.399   |
| bgum         | black gum          | <i>Nyssa sylvatica</i> Marsh.        | 0.363   |
| wsum         | winged sumac       | <i>Rhus copallinum</i> L.            | 0.200   |
| rbay         | redbay             | <i>Persea borbonia</i> (L.) Spreng   | 0.183   |
| wash         | white ash          | <i>Fraxinus americana</i> L.         | 0.181   |
| TOTAL IV     |                    |                                      | 100.000 |

Table S7. ID code, scientific name, and Importance Value (IV) for tree species in Hobcaw cypress-tupelo vegetation type.

| Species code | Common Name    | Scientific Name                      | IV(%)   |
|--------------|----------------|--------------------------------------|---------|
| waxm         | wax myrtle     | <i>Morella cerifera</i> (L.) Small   | 31.606  |
| lobp         | loblolly pine  | <i>Pinus taeda</i> L.                | 21.213  |
| bcyp         | baldcypress    | <i>Taxodium distichum</i> (L.) Rich. | 18.014  |
| bgum         | black gum      | <i>Nyssa sylvatica</i> Marsh.        | 9.814   |
| tall         | Chinese tallow | <i>Triadica sebifera</i> (L.) Small  | 8.898   |
| rbay         | redbay         | <i>Persea borbonia</i> (L.) Spreng   | 2.951   |
| laur         | laurel oak     | <i>Quercus laurifolia</i> Michx.     | 2.312   |
| sgum         | sweetgum       | <i>Liquidambar styraciflua</i> L.    | 2.071   |
| woak         | water oak      | <i>Quercus nigra</i> L.              | 0.749   |
| gash         | green ash      | <i>Fraxinus pennsylvanica</i> Marsh. | 0.690   |
| tupe         | water tupelo   | <i>Nyssa aquatica</i> L.             | 0.572   |
| butn         | buttonbush     | <i>Cephalanthus occidentalis</i> L.  | 0.187   |
| unkn         | unknown        | unknown                              | 0.183   |
| selm         | slippery elm   | <i>Ulmus rubra</i> Muhl.             | 0.117   |
| blue         | blueberry      | <i>Vaccinium elliottii</i> Chapm.    | 0.116   |
| wash         | white ash      | <i>Fraxinus americana</i> L.         | 0.116   |
| ahol         | American holly | <i>Ilex opaca</i> Aiton              | 0.083   |
| pers         | persimmon      | <i>Diospyros virginiana</i> L.       | 0.081   |
| dahn         | dahoon holly   | <i>Ilex cassine</i> L.               | 0.064   |
| rmap         | red maple      | <i>Acer rubrum</i> L.                | 0.060   |
| will         | black willow   | <i>Salix nigra</i> Marsh.            | 0.042   |
| yaup         | yaupon         | <i>Ilex vomitoria</i> Aiton          | 0.036   |
| aelm         | American elm   | <i>Ulmus americana</i> L.            | 0.012   |
| inkb         | inkberry       | <i>Ilex glabra</i> (L.) A. Gray      | 0.011   |
| TOTAL IV     |                |                                      | 100.000 |

Table S8. ID code, scientific name, and Importance Value (IV) for tree species in Hobcaw upland pine hardwood vegetation type.

| Species code | Common Name     | Scientific Name                        | IV(%)   |
|--------------|-----------------|----------------------------------------|---------|
| lobp         | loblolly pine   | <i>Pinus taeda</i> L.                  | 77.008  |
| waxm         | wax myrtle      | <i>Morella cerifera</i> (L.) Small     | 5.833   |
| live         | live oak        | <i>Quercus virginiana</i> Mill.        | 5.198   |
| sgum         | sweetgum        | <i>Liquidambar styraciflua</i> L.      | 3.440   |
| pndp         | pond pine       | <i>Pinus serotina</i> Michx.           | 2.121   |
| rbay         | redbay          | <i>Persea borbonia</i> (L.) Spreng     | 2.072   |
| yaup         | yaupon          | <i>Ilex vomitoria</i> Aiton            | 1.521   |
| tall         | Chinese tallow  | <i>Triadica sebifera</i> (L.) Small    | 0.897   |
| hsug         | horse sugar     | <i>Symplocos tinctoria</i> (L.) L'Hér. | 0.679   |
| laur         | laurel oak      | <i>Quercus laurifolia</i> Michx.       | 0.504   |
| bgum         | black gum       | <i>Nyssa sylvatica</i> Marsh.          | 0.309   |
| woak         | water oak       | <i>Quercus nigra</i> L.                | 0.116   |
| blue         | blueberry       | <i>Vaccinium elliotii</i> Chapm.       | 0.111   |
| ahol         | American holly  | <i>Ilex opaca</i> Aiton                | 0.103   |
| poak         | post oak        | <i>Quercus stellata</i> Wangenh.       | 0.036   |
| inkb         | inkberry        | <i>Ilex glabra</i> (L.) A. Gray        | 0.024   |
| wlok         | willow oak      | <i>Quercus phellos</i> L.              | 0.012   |
| dhol         | deciduous holly | <i>Ilex decidua</i> Walter             | 0.008   |
| unkn         | unknown         | unknown                                | 0.008   |
| TOTAL IV     |                 |                                        | 100.000 |

Table S9. ID code, scientific name, and Importance Value (IV) for tree species in Santee cypress-tupelo vegetation type.

| Species code | Common Name        | Scientific Name                        | IV(%)  |
|--------------|--------------------|----------------------------------------|--------|
| bcyp         | baldcypress        | <i>Taxodium distichum</i> (L.) Rich.   | 16.804 |
| laur         | laurel oak         | <i>Quercus laurifolia</i> Michx.       | 15.149 |
| horn         | hornbeam, ironwood | <i>Carpinus caroliniana</i> Walter     | 12.601 |
| gash         | green ash          | <i>Fraxinus pennsylvanica</i> Marsh.   | 11.701 |
| sgum         | sweetgum           | <i>Liquidambar styraciflua</i> L.      | 7.348  |
| rmap         | red maple          | <i>Acer rubrum</i> L.                  | 5.887  |
| ahol         | American holly     | <i>Ilex opaca</i> Aiton                | 4.580  |
| dhol         | deciduous holly    | <i>Ilex decidua</i> Walter             | 3.643  |
| whik         | water hickory      | <i>Carya aquatica</i> (Michx. f.) Nutt | 2.629  |
| ocup         | overcup oak        | <i>Quercus lyrata</i> Walte            | 2.627  |
| aelm         | American elm       | <i>Ulmus americana</i> L.              | 2.297  |
| coak         | swamp chestnut oak | <i>Quercus michauxii</i> Nutt.         | 1.677  |
| vibo         | viburnum           | <i>Viburnum</i> spp                    | 1.600  |
| selm         | slippery elm       | <i>Ulmus rubra</i> Muhl.               | 1.194  |
| bgum         | black gum          | <i>Nyssa sylvatica</i> Marsh.          | 1.149  |
| welm         | winged elm         | <i>Ulmus alata</i> Michx               | 1.143  |
| tall         | Chinese tallow     | <i>Triadica sebifera</i> (L.) Small    | 1.091  |
| lobp         | loblolly pine      | <i>Pinus taeda</i> L.                  | 1.091  |
| unkn         | unknown            | unknown                                | 1.022  |
| will         | black willow       | <i>Salix nigra</i> Marsh.              | 0.896  |
| sugb         | sugarberry         | <i>Celtis laevigata</i> Willd.         | 0.773  |
| sdog         | swamp dogwood      | <i>Cornus foemina</i> Mill.            | 0.764  |
| woak         | water oak          | <i>Quercus nigra</i> L.                | 0.738  |
| butn         | buttonbush         | <i>Cephalanthus occidentalis</i> L.    | 0.633  |
| hawt         | hawthorn           | <i>Crataegus</i> spp.                  | 0.225  |
| cbok         | cherrybark oak     | <i>Quercus pagoda</i> Raf.             | 0.211  |
| mhik         | mockernut hickory  | <i>Carya tomentosa</i> (Lam.) Nutt.    | 0.185  |
| mulb         | red mulberry       | <i>Morus rubra</i> L.                  | 0.054  |
| wsum         | winged sumac       | <i>Rhus copallinum</i> L.              | 0.040  |
| elm          | elm                | <i>Ulmus</i> spp.                      | 0.036  |

|          |                       |                                    |         |
|----------|-----------------------|------------------------------------|---------|
| wlok     | willow oak            | <i>Quercus phellos</i> L.          | 0.035   |
| blko     | black oak             | <i>Quercus velutina</i> Lam.       | 0.034   |
| cwil     | coastal plains willow | <i>Salix caroliniana</i> Michx.    | 0.022   |
| pers     | persimmon             | <i>Diospyros virginiana</i> L.     | 0.020   |
| rbay     | redbay                | <i>Persea borbonia</i> (L.) Spreng | 0.018   |
| live     | live oak              | <i>Quercus virginiana</i> Mill.    | 0.017   |
| shok     | Shumard oak           | <i>Quercus shumardii</i> Buckley   | 0.017   |
| cedr     | eastern redcedar      | <i>Juniperus virginiana</i> L.     | 0.017   |
| ypop     | yellow poplar         | <i>Liriodendron tulipifera</i> L.  | 0.016   |
| waxm     | wax myrtle            | <i>Morella cerifera</i> (L.) Small | 0.016   |
| TOTAL IV |                       |                                    | 100.000 |

Table S10. ID code, scientific name, and Importance Value (IV) for tree species in Santee bottomland hardwood vegetation type.

| Species code | Common Name        | Scientific Name                         | IV(%)  |
|--------------|--------------------|-----------------------------------------|--------|
| rmap         | red maple          | <i>Acer rubrum</i> L.                   | 28.074 |
| laur         | laurel oak         | <i>Quercus laurifolia</i> Michx.        | 20.873 |
| sgum         | sweetgum           | <i>Liquidambar styraciflua</i> L.       | 10.499 |
| horn         | ironwood           | <i>Carpinus caroliniana</i> Walter      | 8.329  |
| selm         | slippery elm       | <i>Ulmus rubra</i> Muhl.                | 6.633  |
| gash         | green ash          | <i>Fraxinus pennsylvanica</i> Marsh.    | 4.646  |
| wlok         | willow oak         | <i>Quercus phellos</i> L.               | 2.946  |
| bgum         | black gum          | <i>Nyssa sylvatica</i> Marsh.           | 2.812  |
| dhol         | deciduous holly    | <i>Ilex decidua</i> Walter              | 2.416  |
| welm         | winged elm         | <i>Ulmus alata</i> Michx                | 1.972  |
| waxm         | wax myrtle         | <i>Morella cerifera</i> (L.) Sma        | 1.809  |
| sdog         | swamp dogwood      | <i>Cornus foemina</i> Mill.             | 1.634  |
| blko         | swamp dogwood      | <i>Cornus foemina</i> Mill.             | 1.366  |
| coak         | swamp chestnut oak | <i>Quercus michauxii</i> Nutt.          | 1.126  |
| ahol         | American holly     | <i>Ilex opaca</i> Aiton                 | 1.111  |
| whik         | water hickory      | <i>Carya aquatica</i> (Michx. f.) Nutt. | 0.693  |
| pers         | persimmon          | <i>Diospyros virginiana</i> L.          | 0.665  |
| unkn         | unknown            | unknown                                 | 0.579  |
| bcyp         | baldcypress        | <i>Taxodium distichum</i> (L.) Rich.    | 0.497  |
| swill        | black willow       | <i>Salix nigra</i> Marsh.               | 0.275  |
| dogw         | flowering dogwood  | <i>Cornus florida</i> L.                | 0.192  |
| tall         | Chinese tallow     | <i>Triadica sebifera</i> (L.) Small     | 0.151  |
| vibo         | viburnum           | <i>Viburnum</i> spp.                    | 0.127  |
| lobp         | loblolly pine      | <i>Pinus taeda</i> L.                   | 0.126  |
| sugb         | sugarberry         | <i>Celtis laevigata</i> Willd.          | 0.112  |
| hsug         | horse sugar        | <i>Symplocos tinctoria</i> (L.) L'Hér.  | 0.093  |
| woak         | water oak          | <i>Quercus nigra</i> L.                 | 0.080  |
| rhik         | shagbark hickory   | <i>Carya ovata</i> (Mill.) K. Koch      | 0.065  |
| aelm         | American elm       | <i>Ulmus americana</i> L.               | 0.054  |
| tupe         | water tupelo       | <i>Nyssa aquatica</i> L.                | 0.015  |



|          |            |                                     |         |
|----------|------------|-------------------------------------|---------|
| butn     | buttonbush | <i>Cephalanthus occidentalis</i> L. | 0.014   |
| hawt     | hawthorn   | <i>Crataegus spp.</i>               | 0.140   |
| TOTAL IV |            |                                     | 100.000 |

Table S11. ID code, scientific name, and Importance Value (IV) for tree species in Santee upland pine hardwood vegetation type.

| Species code | Common Name       | Scientific Name                        | IV(%)   |
|--------------|-------------------|----------------------------------------|---------|
| lobp         | loblolly pine     | <i>Pinus taeda</i> L.                  | 48.354  |
| woak         | water oak         | <i>Quercus nigra</i> L.                | 13.885  |
| bgum         | black gum         | <i>Nyssa sylvatica</i> Marsh.          | 11.188  |
| sgum         | sweetgum          | <i>Liquidambar styraciflua</i> L.      | 8.244   |
| rmap         | red maple         | <i>Acer rubrum</i> L.                  | 6.709   |
| rbay         | redbay            | <i>Persea borbonia</i> (L.) Spreng     | 2.385   |
| poak         | post oak          | <i>Quercus stellata</i> Wangenh.       | 2.316   |
| ahol         | American holly    | <i>Ilex opaca</i> Aiton                | 2.135   |
| hsug         | horse sugar       | <i>Symplocos tinctoria</i> (L.) L'Hér. | 1.290   |
| wlok         | willow oak        | <i>Quercus phellos</i> L.              | 1.038   |
| waxm         | wax myrtle        | <i>Morella cerifera</i> (L.) Small     | 0.988   |
| blue         | blueberry         | <i>Vaccinium elliotii</i> Chapm.       | 0.367   |
| long         | longleaf pine     | <i>Pinus palustris</i> Mill.           | 0.185   |
| blko         | black oak         | <i>Quercus velutina</i> Lam.           | 0.136   |
| laur         | laurel oak        | <i>Quercus laurifolia</i> Michx.       | 0.136   |
| shrt         | shortleaf pine    | <i>Pinus echinata</i> Mill.            | 0.118   |
| live         | live oak          | <i>Quercus virginiana</i> Mill.        | 0.111   |
| sred         | southern red oak  | <i>Quercus falcata</i> Michx.          | 0.090   |
| sbay         | sweetbay          | <i>Magnolia virginiana</i> L.          | 0.088   |
| bech         | beech             | <i>Fagus grandifolia</i> Ehrh.         | 0.049   |
| welm         | winged elm        | <i>Ulmus alata</i> Michx.              | 0.033   |
| unkn         | unknown           | unknown                                | 0.024   |
| dogw         | flowering dogwood | <i>Cornus florida</i> L.               | 0.024   |
| cher         | black cherry      | <i>Prunus serotina</i> Ehrh.           | 0.023   |
| wsum         | winged sumac      | <i>Rhus copallinum</i> L.              | 0.023   |
| cbok         | cherrybark oak    | <i>Quercus pagoda</i> Raf.             | 0.014   |
| gash         | green ash         | <i>Fraxinus pennsylvanica</i> Marsh.   | 0.013   |
| unkn2        | unknown2          | unknown2                               | 0.012   |
| bjok         | blackjack oak     | <i>Quercus marilandica</i> Münchh.     | 0.012   |
| dlau         | dwarf laurel      | <i>Prunus laurocerasus</i>             | 0.011   |
| TOTAL IV     |                   |                                        | 100.000 |

## Supplementary data

### Data trends

Data trends from the entire study period to date (1994-2016) are presented here in order to display long-term changes (**Figs. S1-S11**). Please note that although the format of the figures is uniform, the scale changes greatly due to varying overstory types.

### Beidler Forest

Cypress-tupelo plots were dominated in 1994 by bald cypress (*Taxodium distichum* (L.) Rich., 29.3 m<sup>2</sup>/ha, 103.8 stems/ha) and water tupelo (*Nyssa aquatica* L., 35.9 m<sup>2</sup>/ha, 286.3 stems/ha) trees with a smaller black gum (*Nyssa sylvatica* Marsh.) component. The sapling layer was almost exclusively made up of green ash (*Fraxinus pennsylvanica* Marsh.) throughout the study period. Sapling-size green ash stems decreased 30% from 1994 to 2016 (1248.8 to 875 stems/ha) but remained relatively high. The density of green ash tree-size stems increased steadily by 36% from 1994 to 2016. Bald cypress, tupelo, and black gum BA and density changed little in both trees and saplings (**Fig. S1**).

The bottomland hardwoods were dominated in 1994 (the first year of sampling) by sweetgum (*Liquidambar styraciflua* L., 9.5 m<sup>2</sup>/ha, 50 stems/ha), laurel oak (*Quercus laurifolia* Michx., 7.3 m<sup>2</sup>/ha, 211.3 stems/ha), and bald cypress ( 5.6 m<sup>2</sup>/ha, 53.8 stems/ha). The sapling layer consisted of laurel oak (215 stems/ha), hornbeam (*Carpinus caroliniana* Walt., 143.8 stems/ha), green ash (85 stems/ha), and red maple (*Acer rubrum* L., 83.8 stems/ha). Tree-size bald cypress and sweetgum BA increased slightly (**Fig. S2**). Laurel oak trees increased in BA throughout the study and have assumed a dominant position in the overstory. Tree-size laurel oak were the most abundant throughout the study period. In the sapling layer, the dominant laurel oak, hornbeam, and red maple numbers were steady until 2000 but have declined since then (**Fig. S2**).

In 1994, the ridge bottom plots contained a diverse overstory of sweetgum (2.4 m<sup>2</sup>/ha), water oak (*Quercus nigra* L., 1.7 m<sup>2</sup>/ha), hornbeam (1.3 m<sup>2</sup>/ha), and laurel oak (0.43 m<sup>2</sup>/ha). Sweetgum, water oak, hornbeam, and laurel oak trees increased in BA and density up to 2016. The most dominant tree was hornbeam (**Fig. S3**) whose density doubled between 1994 and 2000. In 2016 hornbeam remained the most abundant while the less-dense sweetgum had the highest BA (85 stems/ha, 4.5 m<sup>2</sup>/ha). The sapling layer was mostly hornbeam in 1994 but included sweetgum, water oak, American holly (*Ilex opaca* Ait.), and laurel oak. Hornbeam remained dominant in the sapling layer throughout the study (**Fig. S3**). The other species remained mostly unchanged by 2016, except for American holly which mildly increased in both BA and density consistently from 1994 (**Fig. S3**).

A.

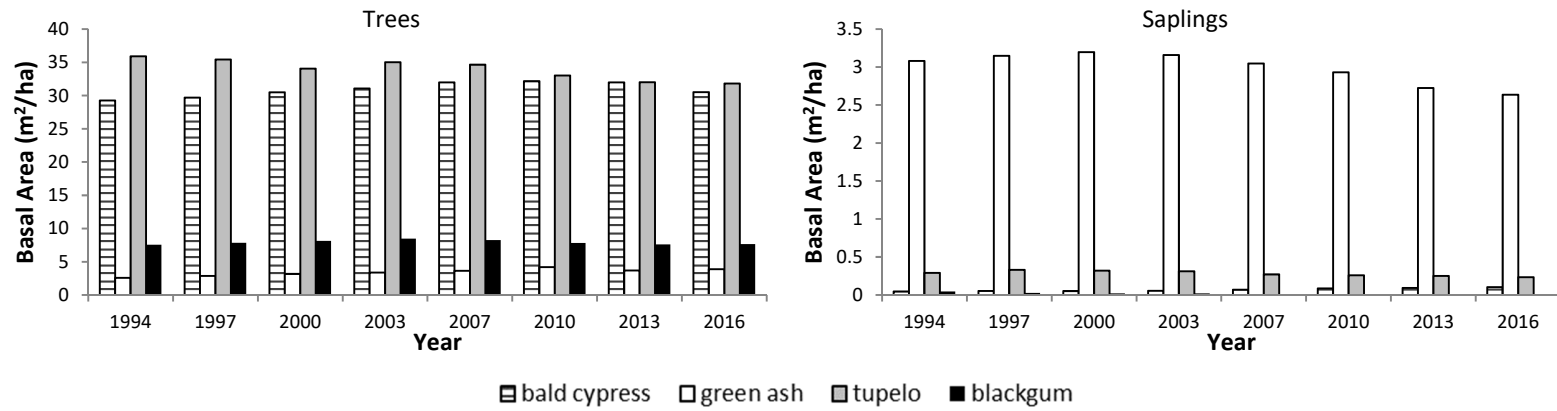

B.

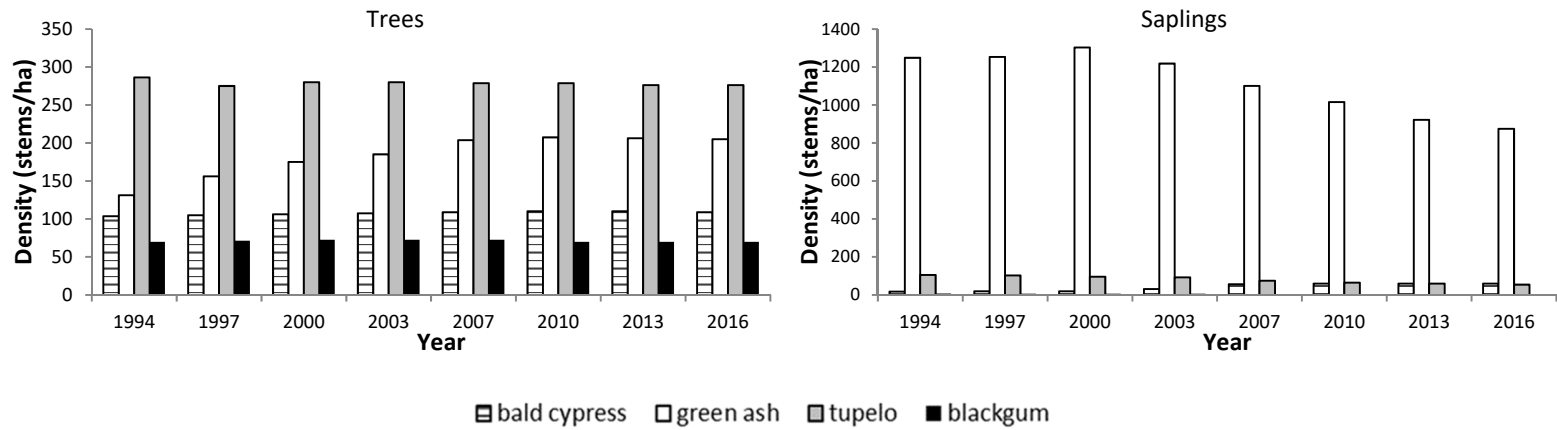

**Figure S1** (A) Basal area and (B) density changes for dominant species in the cypress-tupelo type at Beidler Forest.

A.

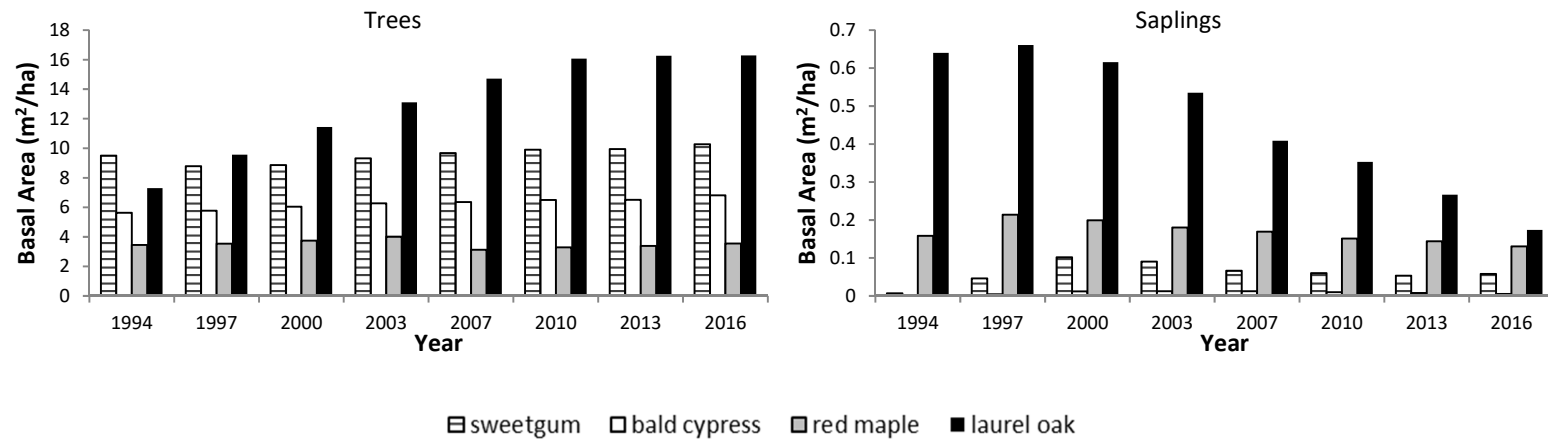

B.

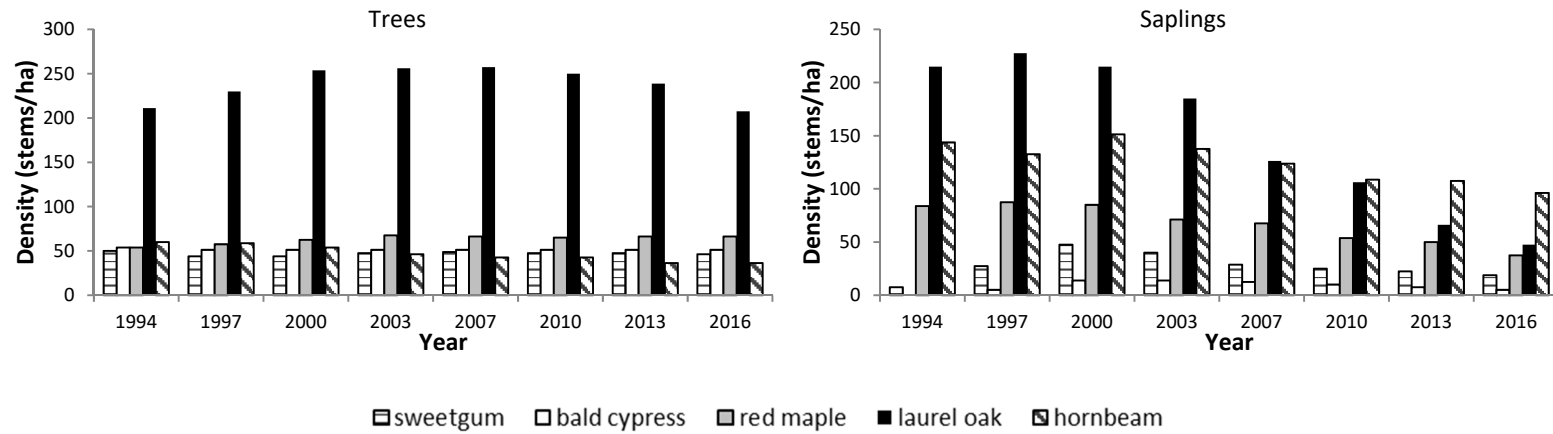

**Figure S2 (A)** Basal area and **(B)** density changes for dominant species in the bottomland hardwood forest type at Beidler Forest.

A.

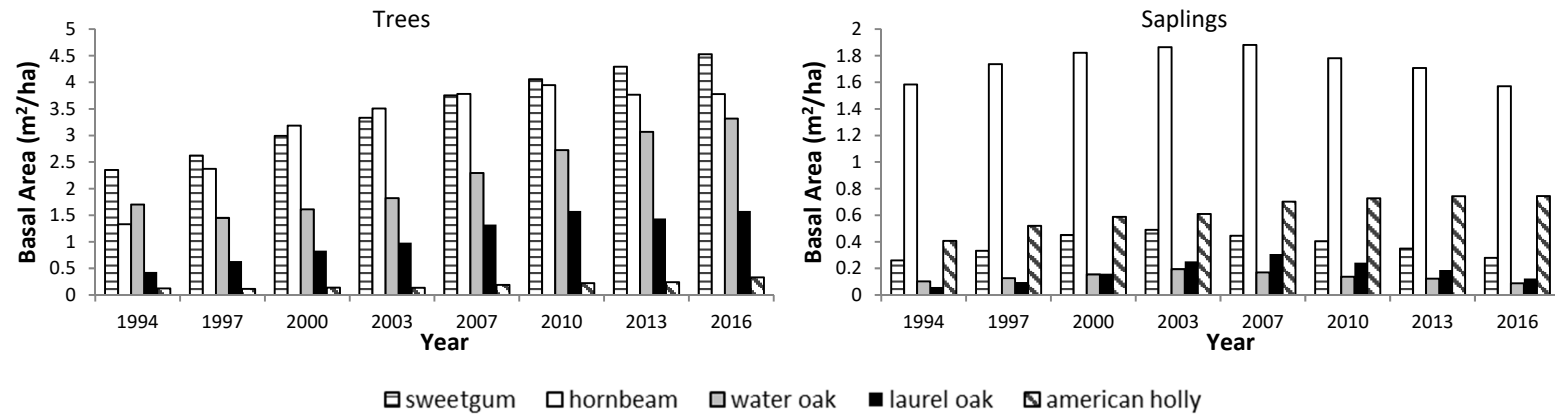

B.

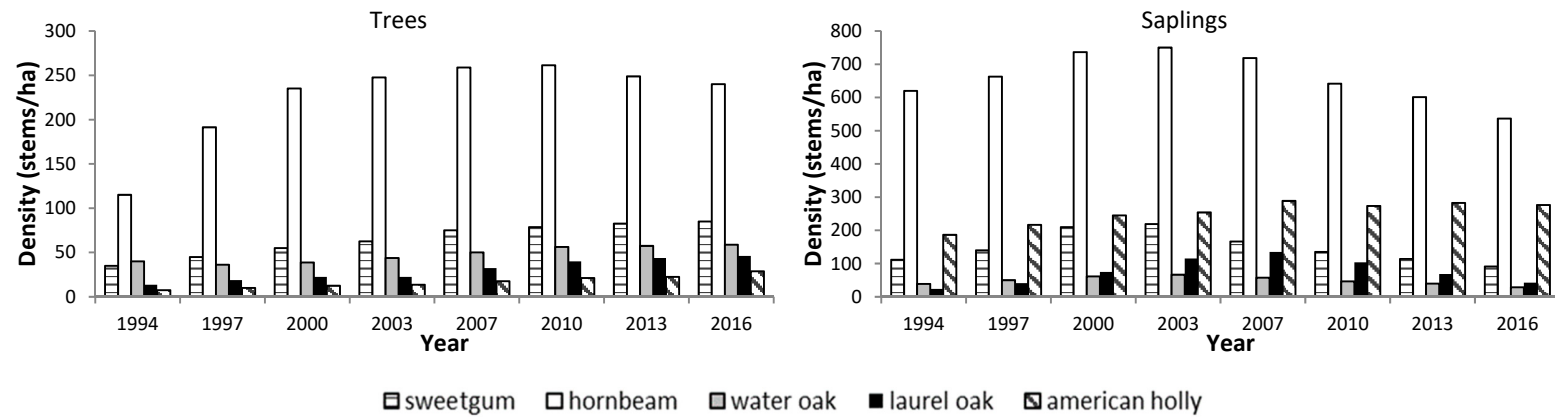

**Figure S3 (A)** Basal area and **(B)** density changes for dominant species in the ridge bottom forest type at Beidler Forest.

## Congaree National Park

The cypress-tupelo forest type plots were dominated in 1994 in the tree size class by water tupelo (27.3 m<sup>2</sup>/ha, 298.8 stems/ha), bald cypress (14.3 m<sup>2</sup>/ha, 91.3 stems/ha) and swamp tupelo (*Nyssa biflora* Walt., 9.1 m<sup>2</sup>/ha, 101.3 stems/ha). Most of the 1994 sapling strata consisted of white ash (*Fraxinus americana* L., 130 stems/ha) and water tupelo (40 stems/ha). Water tupelo, bald cypress, and swamp tupelo trees increased in BA during the study period (**Fig. S4**), while other species changed little in BA. Red maple sapling density increased nearly five-fold by 2007, then decreased by about 31% by 2016. The density of white ash saplings decreased throughout the study period, resulting in a 2016 population of less than half of the 1994 population (**Fig. S4**).

In 1994, the bottomland hardwood plots were dominated by sweetgum (25.4 m<sup>2</sup>/ha) and to a lesser extent American holly (2.8 m<sup>2</sup>/ha). The sapling layer was initially dominated by deciduous holly (*Ilex decidua* Walt., 0.23 m<sup>2</sup>/ha, 109 stems/ha) and pawpaw (*Asimina triloba* (L.) Dunal, 0.11 m<sup>2</sup>/ha, 99 stems/ha). Deciduous holly, American holly, and pawpaw sapling density increased dramatically between the 2003 and 2007 censuses. The BA of sweetgum and American holly trees changed little throughout the study (**Fig. S5**).

The pine-hardwood plot of Congaree was dominated in 1994 in the tree strata by loblolly pine (*Pinus taeda* L., 17.7 m<sup>2</sup>/ha, 35 stems/ha), sweetgum (6.9 m<sup>2</sup>/ha, 50 stems/ha), and hornbeam (2.6 m<sup>2</sup>/ha, 150 stems/ha). The sapling layer was established in 2007 and was mostly hornbeam (0.93 m<sup>2</sup>/ha, 335 stems/ha), American holly (0.34 m<sup>2</sup>/ha, 115 stems/ha), and red maple (0.19 m<sup>2</sup>/ha, 75 stems/ha). Tree-size loblolly pine BA increased slightly by 2016 and the density of tree-size loblolly pine remained consistent (**Fig. S6**). Hornbeam was the most abundant in the tree layer and in the sapling layer throughout the study.

A.

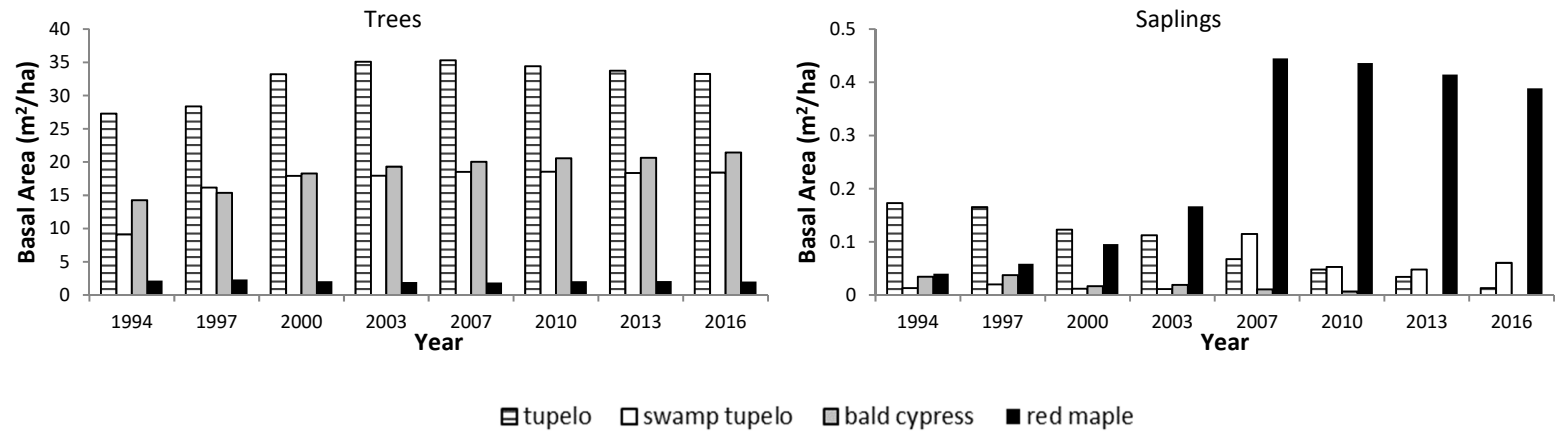

B.

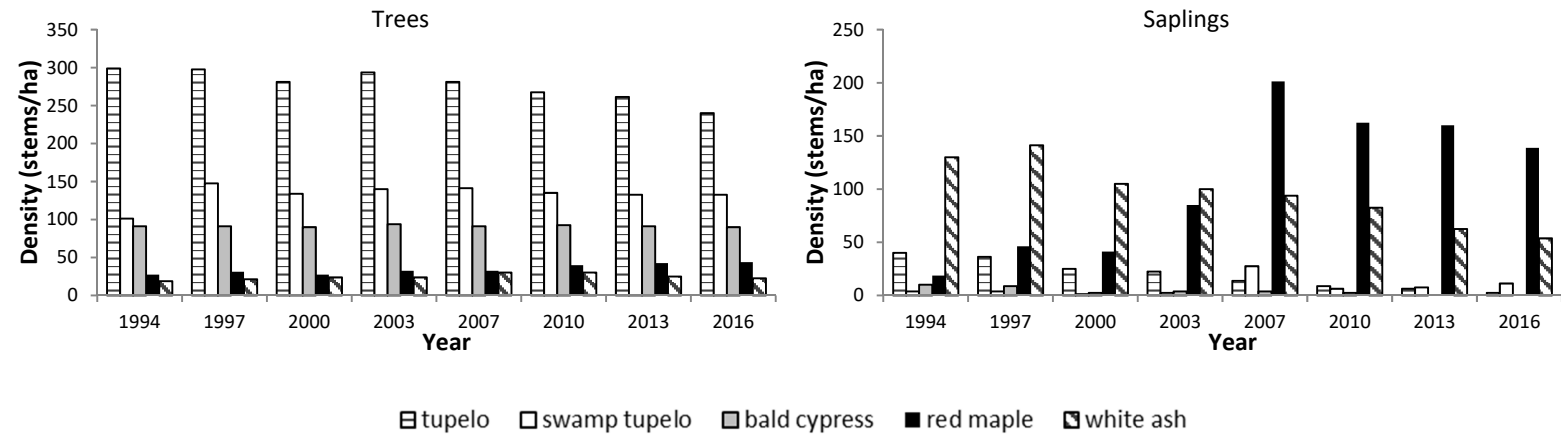

**Figure S4 (A)** Basal area and **(B)** density changes for important species in the cypress-tupelo forest type at Congaree National Park.



A.

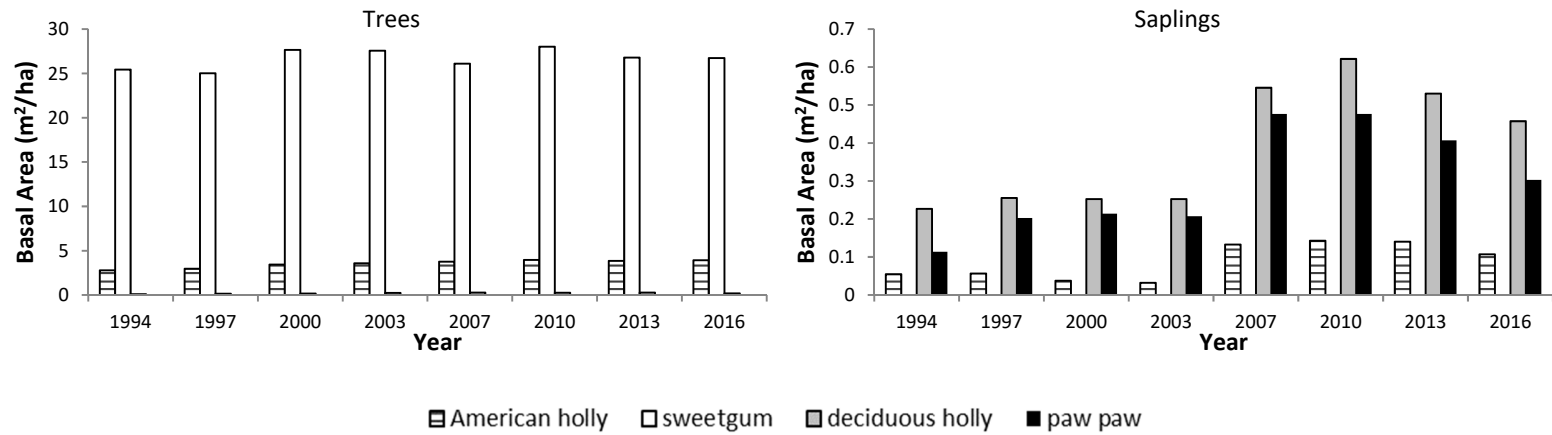

B.

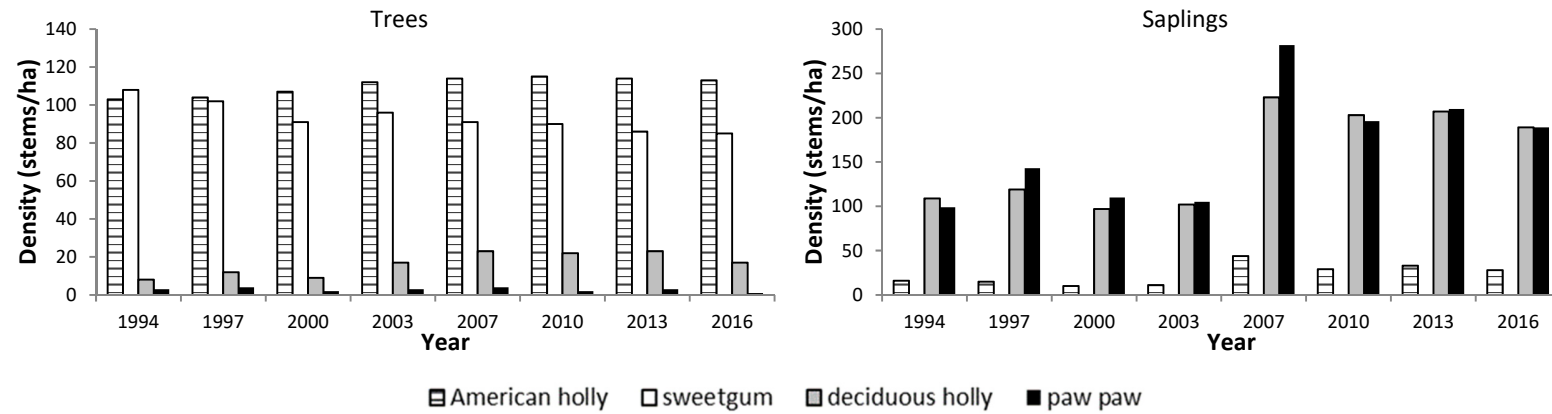

**Figure S5 (A)** Basal area and **(B)** density changes for important species in the bottomland hardwood forest type at Congaree National Park.

A.

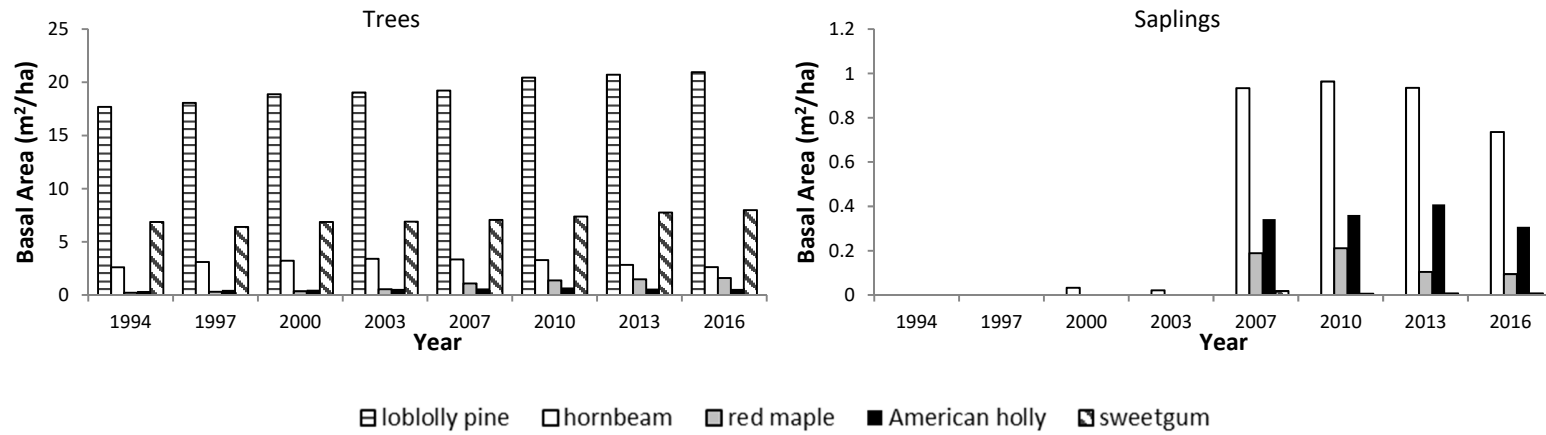

B.

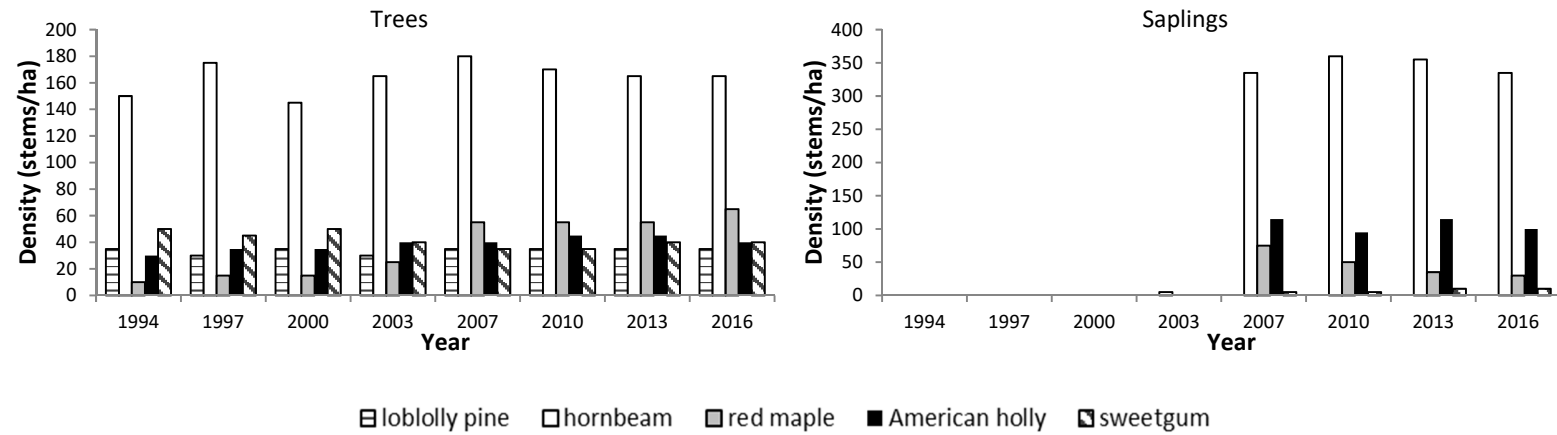

**Figure S6 (A) Basal area and (B) density changes for important species in the pine hardwood forest type at Congaree National Park.**

## Hobcaw Barony

In 1994, the tree strata of the cypress-tupelo plots consisted of black gum (4.3 m<sup>2</sup>/ha, 83.8 stems/ha), bald cypress (3.8 m<sup>2</sup>/ha, 45 stems/ha), and laurel oak (1.1 m<sup>2</sup>/ha, 7.5 stems/ha). Most sapling-sized stems were wax myrtle (*Morella cerifera* (L.) Small, 250 stems/ha), loblolly pine (46.3 stems/ha), and redbay (*Persea borbonia* (L.) Spreng., 33.8 stems/ha). Black gum tree BA and density remained consistent throughout the study period. Loblolly pine BA increased to about one hundred and twelve times the initial amount by 2016 and loblolly density increased as well (**Fig. S7**), surpassing black gum in both tree BA and density. Bald cypress tree density nearly quadrupled over the 23-year period and Chinese tallow density increased thirty-two times from 1997 to 2016, while other tree densities were relatively unchanged (**Fig. S7**). The number of wax myrtle stems entering the tree layer was low throughout the study and by 2016 wax myrtle tree density reached 22.5 stems/ha. In the sapling strata, wax myrtle density rose substantially from 250 stems/ha in 1994 to 2,195 stems/ha in 2007, then decreased to 1,277.5 stems/ha by 2016 (**Fig. S7**). Bald cypress, loblolly, and red bay sapling densities also increased, resulting in a dense sapling layer by the end of the study period.

Both the tree and the sapling layer in upland pine-hardwood plots were dominated by loblolly pine throughout the study. Live oak tree-size stems increased by 115% in BA and 80% in density over the study period. Wax myrtle and red bay represented a smaller component of the sapling layer and had slight growth in density and BA from 1994 to 2016. (**Fig. S8**)

A.

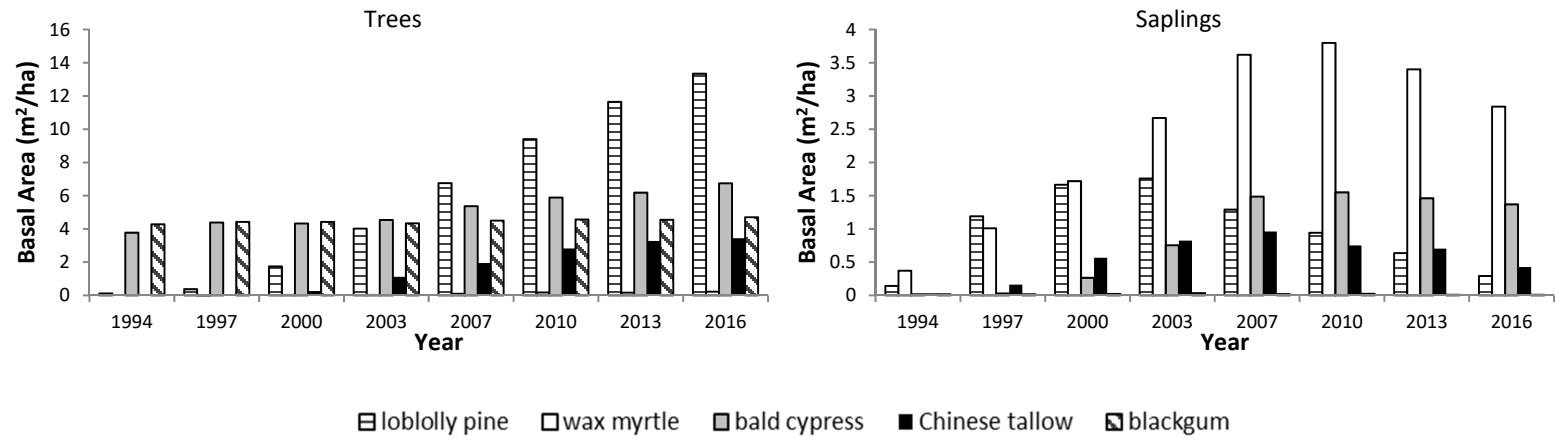

B.

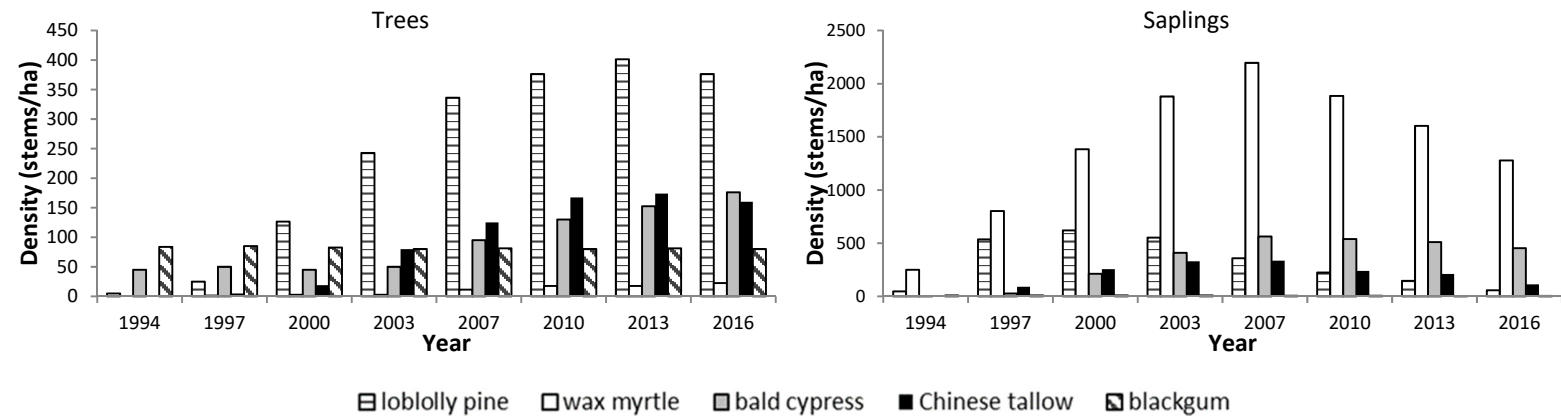

**Figure S7 (A)** Basal area and **(B)** density changes for important species in the cypress-tupelo forest type at Hobcaw Barony.

A.

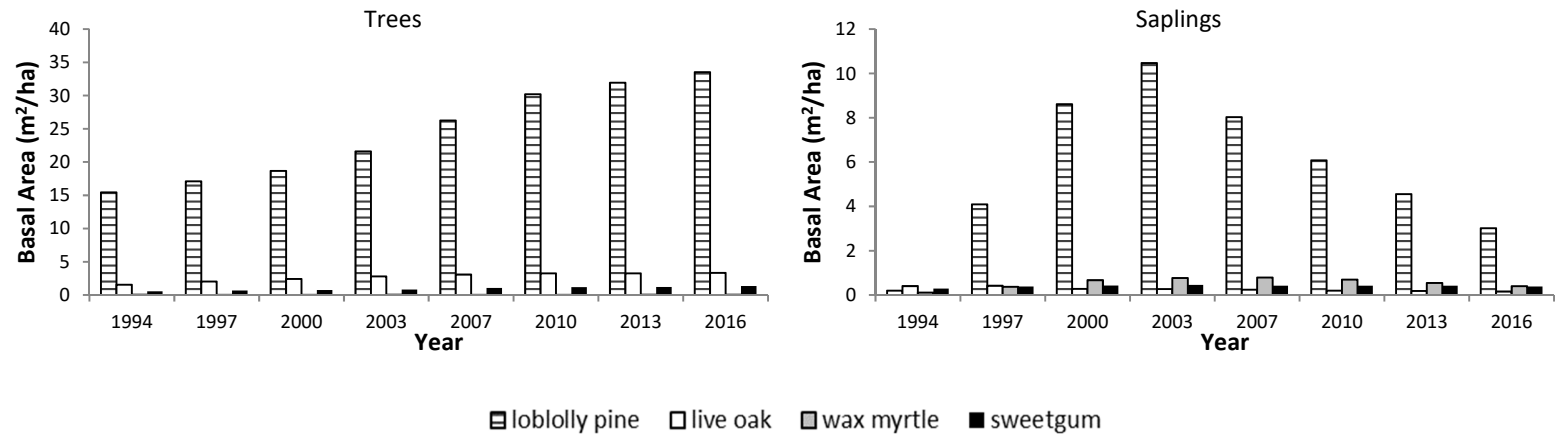

B.

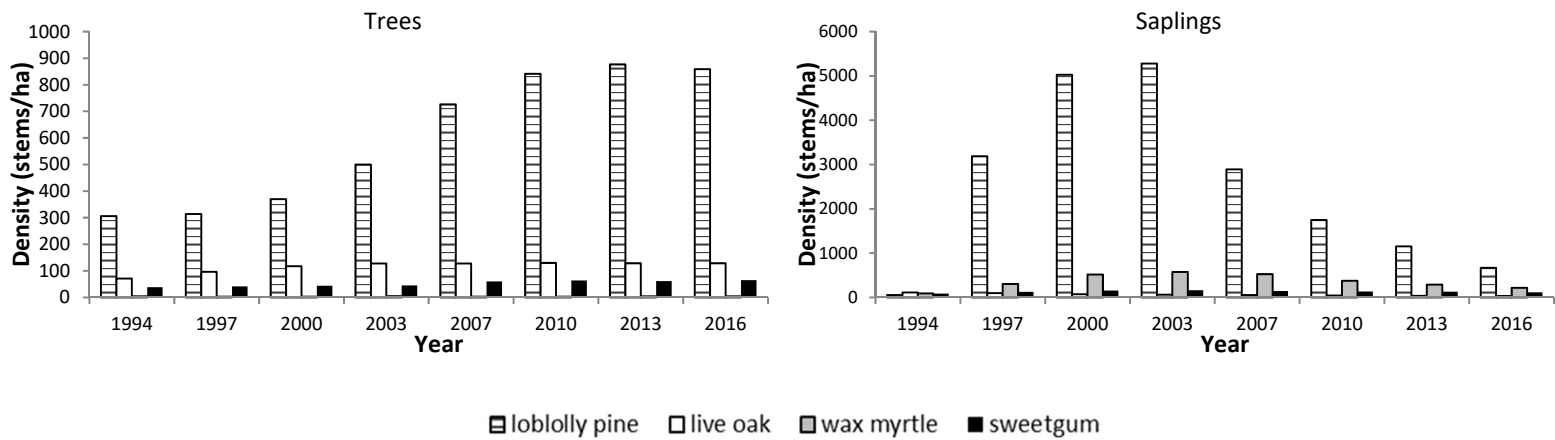

**Figure S8 (A)** Basal area and **(B)** density changes for important species in the upland pine-hardwood forest type at Hobcaw Barony.

## Santee Experimental Forest

The cypress-tupelo type plots in Santee were adjacent to the BLH plots and were divided by Nicholson Creek. In 1994, bald cypress contributed 9.7 m<sup>2</sup>/ha (30 stems/ha) to the cypress-tupelo forest type (total of 22.3 m<sup>2</sup>/ha in BA). Other less-dominant overstory species included sweetgum (2.7 m<sup>2</sup>/ha, 11.3 stems/ha), loblolly pine (0.58 m<sup>2</sup>/ha, 1.3 stems/ha), and overcup oak (*Quercus lyrata* Walt., 1.2 m<sup>2</sup>/ha, 5 stems/ha). Sapling strata consisted of laurel oak (222.5 stems/ha), green ash (187.5 stems/ha), hornbeam (170 stems/ha), and American holly (97.5 stems/ha). The BA and density of laurel oak trees increased substantially over the course of the study, while other species changed little in BA and density (**Fig. S9**). In the sapling strata, green ash and hornbeam increased greatly. Green ash density almost tripled and hornbeam density more than doubled by 2003, but had begun to decline by 2016. American holly sapling density nearly doubled by 2013, but tree BA of the species saw a slight decline throughout the study. Other species in the sapling strata did not increase greatly in density.

The bottomland hardwood plots were dominated in 1994 by red maple (3.7 m<sup>2</sup>/ha, 160 stems/ha), laurel oak (1.5 m<sup>2</sup>/ha, 21.3 stems/ha), and sweetgum (2.9 m<sup>2</sup>/ha, 75 stems/ha) tree-size stems. The BA of red maple, laurel oak, and sweetgum increased with each census (**Fig. S10**). Red maple and sweetgum BA doubled, and laurel oak BA was over five times the initial BA in 2016. Red maple saplings reached a peak density (880 stems/ha) at the 2000 census and laurel oak saplings were at peak density (598.3 stems/ha) in 2003. By 2016 red maple and laurel oak sapling density had decreased by 56% and 43%, respectively. Between 2000 and 2016, red maple and laurel oak tree densities increased by 24% and 133%, respectively. Hornbeam sapling BA and density increased throughout the study, and hornbeam remained a minor component of the tree layer (**Fig. S10**).

The tree layer of the upland pine-hardwood plots mostly consisted of loblolly pine (4.9 m<sup>2</sup>/ha, 70 stems/ha), black gum (1.5 m<sup>2</sup>/ha, 105 stems/ha), and water oak (1.1 m<sup>2</sup>/ha, 66.3 stems/ha) in 1994. Tree-size loblolly pine BA and density increased substantially throughout the study (**Fig. S11**). Black gum and water oak had less dramatic increases in size and abundance and were a much smaller component of the tree layer compared to loblolly pine by 2016. Sapling-size loblolly pine BA and density rose rapidly, reached a peak in 2003, and subsequently decreased by 77% by 2016. Loblolly pine tree density increased by 87% between 2003 and 2016. Water oak saplings followed a similar trend to loblolly saplings but with less dramatic changes in BA and density. Red maple saplings reached a peak density in 2000 (335 stems/ha) and decreased slightly in the following years, while the density of tree-size red maple increased (**Fig. S11**).

A.

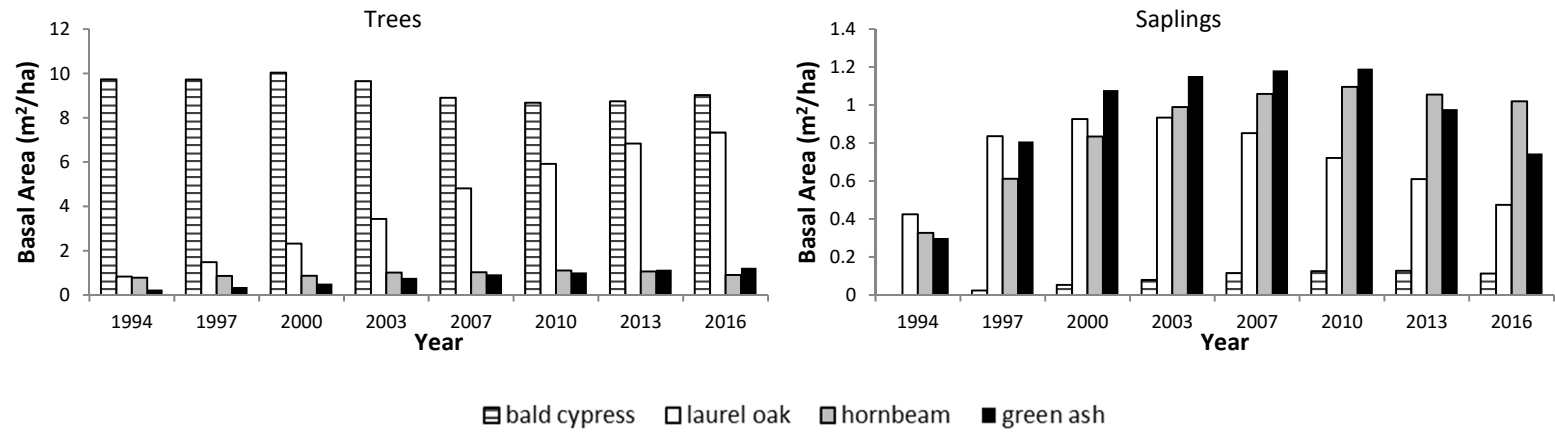

B.

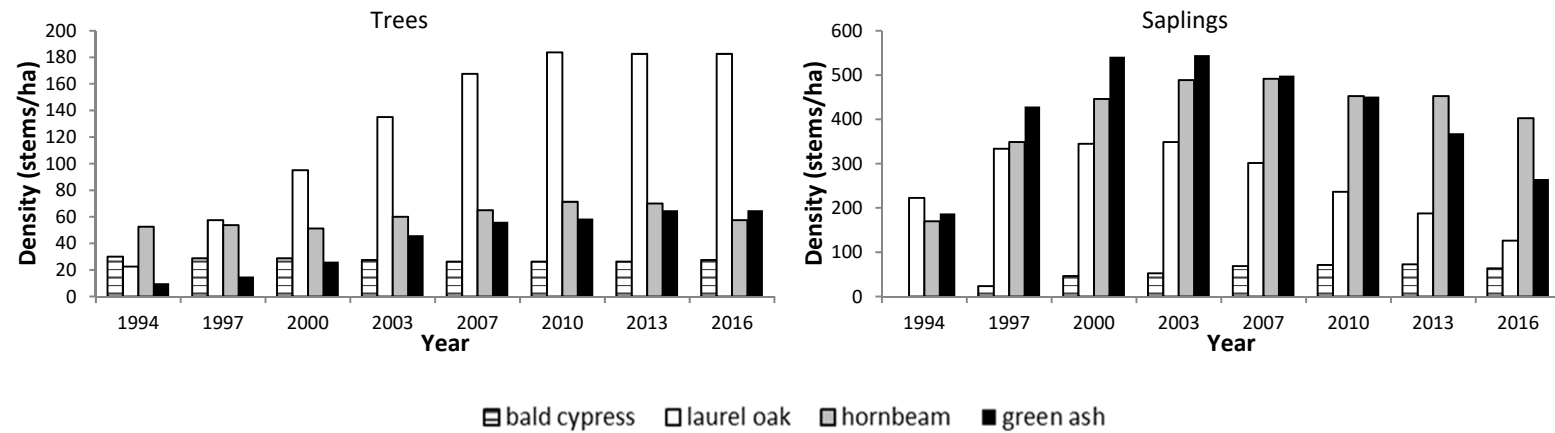

**Figure S9 (A)** Basal area and **(B)** density changes for important species in the cypress-tupelo forest type at Santee Experimental Forest.

A.

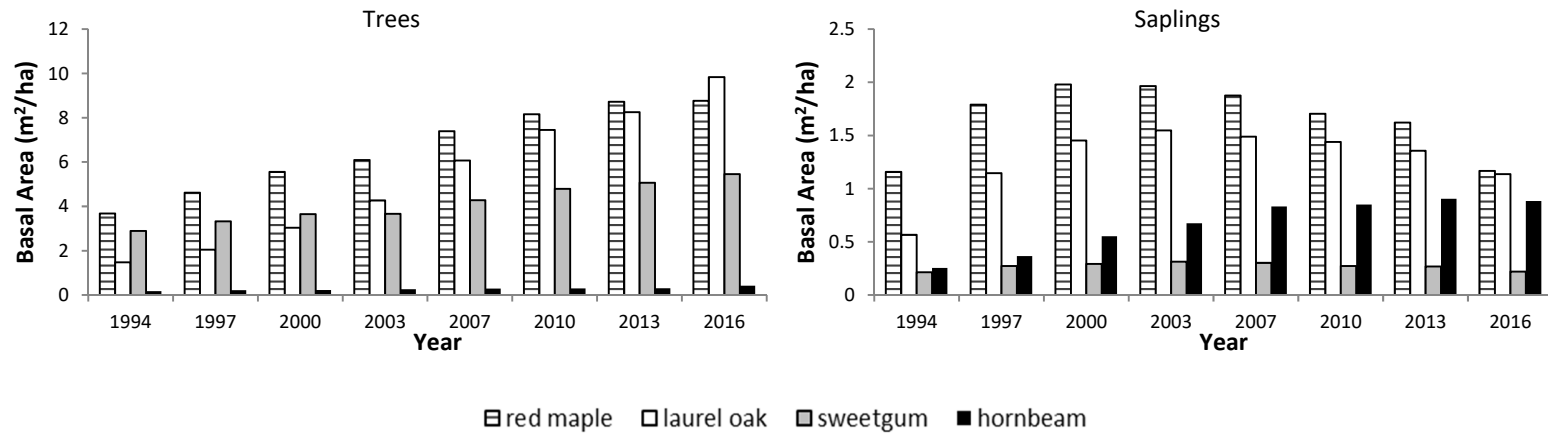

B.

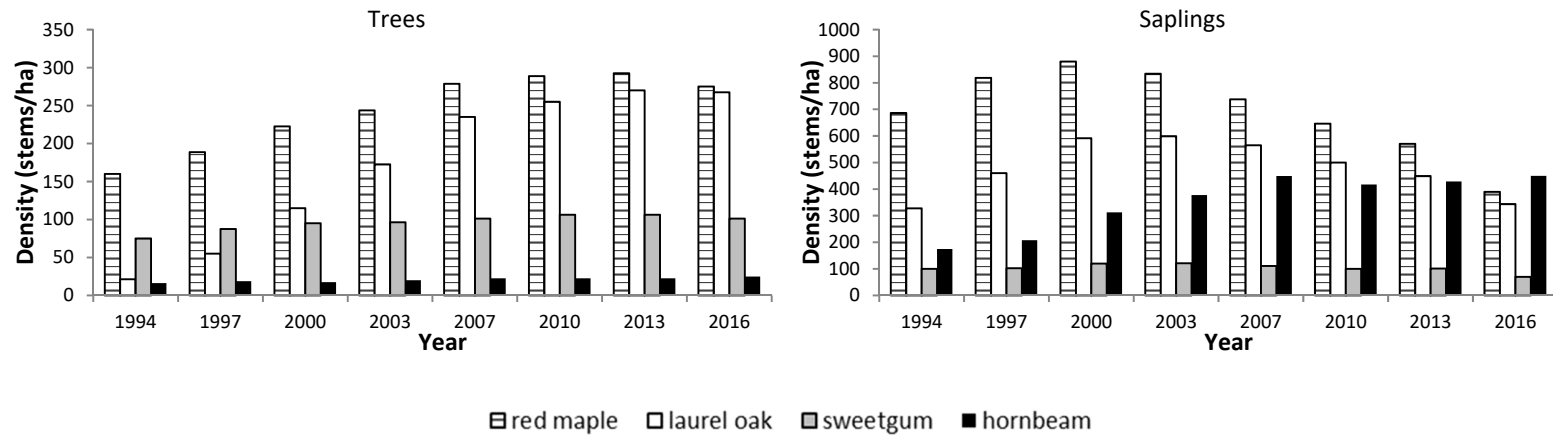

**Figure S10 (A)** Basal area and **(B)** density changes for important species in the bottomland hardwood forest type at Santee Experimental Forest.



A.

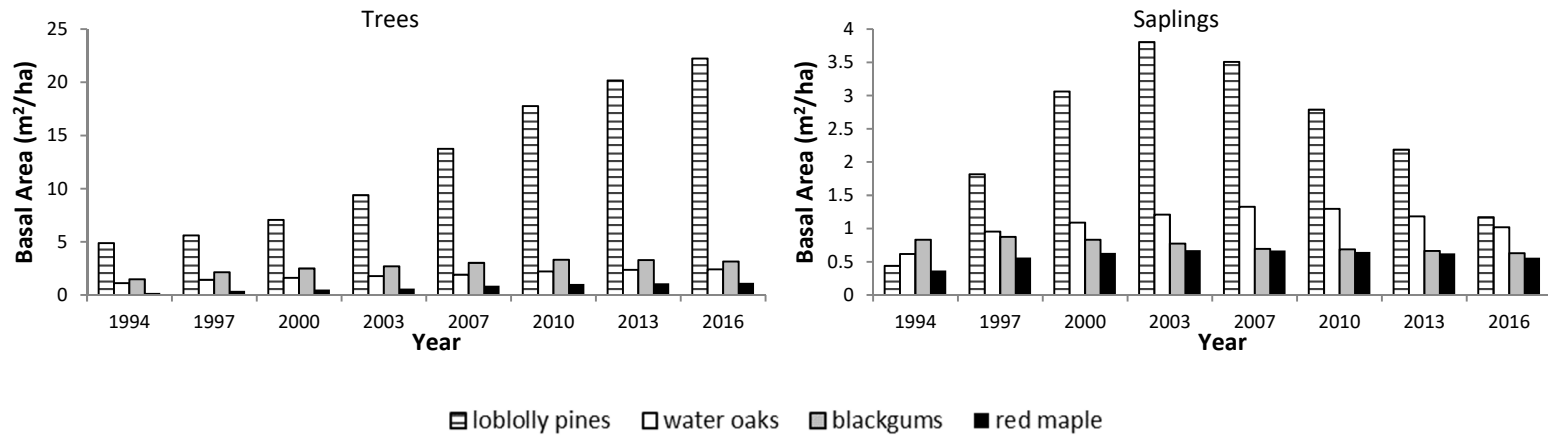

B.

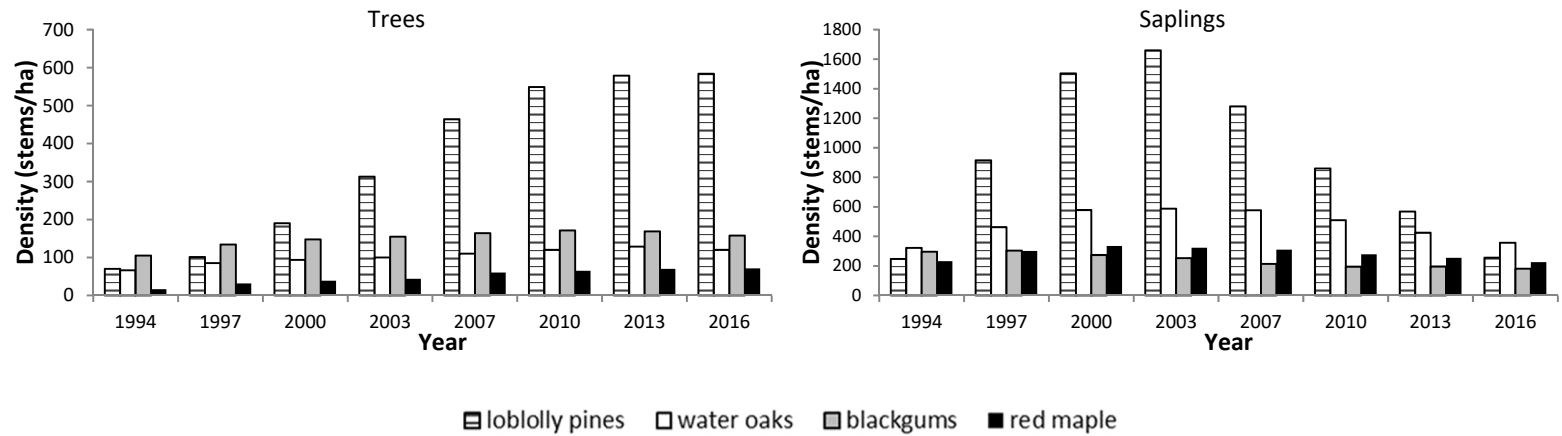

**Figure S11 (A)** Basal area and **(B)** density changes for important species in the upland pine-hardwood forest type at Santee Experimental Forest.
